# Supplementary material for: The Lyell Collection at the Earth Sciences Department, Natural History Museum, London (UK)
Source: Biodivers Data J. 2019 Feb 19;(7):e33504. doi: 10.3897/BDJ.7.e33504 (PMC6391367; doi:10.3897/BDJ.7.e33504)
Supplement: Supplementary material 1 — Appendix [file bdj-07-e33504-s001.csv]

Presented by	from Lyell	from Stimpson to Lyell	from Seguenza to Lyell	from W. Mantell to Lyell	from Lyell to Busk	from Lords of Admiralty to Lyell	from Fleming to Lyell	from Enniskillen to Lyell	from Darwin to Lyell	from H. Cumming	from Bunbury to Lyell	from Beck to Lyell
Lyell (1846- 1875)	1106	4	0	40	0	1	3	0	9	4	6	2
Museum of Practical Geology (1880)	34	0	0	0	0	0	0	0	0	0	0	0
Leonard Lyell (1913)	3	0	0	0	0	0	0	1	0	0	0	0
Lady Lyell (1980)	1	0	0	0	0	0	0	0	0	0	0	0
Geological Society of London (1911)	71	0	47	0	19	0	0	0	0	0	6	0
Miss Busk (1899)	394	0	0	0	0	0	0	0	0	0	0	0
Sowerby (1861)	24	0	0	0	0	0	0	0	0	0	0	0
